# Supplementary material for: Porcine Epidemic Diarrhea Virus and Discovery of a Recombinant Swine Enteric Coronavirus, Italy
Source: PubMed Central journal article supplement (PMC4696687; doi:10.3201/eid2201.150544), 2016-01
Supplement: 15-0544-Techapp-s1.pdf [file 15-0544-Techapp-s1.pdf]

# Porcine Epidemic Diarrhea Virus and Discovery of a Recombinant Swine Enteric Coronavirus, Italy

## Technical Appendix

### Additional Methods and Details

#### Clinical Samples

Fecal and intestinal samples were collected from pigs with clinical signs of diarrhea. The specimens were homogenized in phosphate-buffered saline (10% wt/vol), centrifuged at 2,000 g for 10 min, and the supernatant was poured into a new tube and stored at  $-80^{\circ}\text{C}$ .

#### Virus Detection

Negative staining electron microscopy was performed as previously described (1). A double antibody sandwich ELISA was performed by using monoclonal antibodies (2). Virus isolation of Porcine epidemic diarrhea virus (PEDV) was attempted on Vero cells in minimum essential medium Eagle (MEM) (Sigma-Aldrich, Saint Louis, Missouri, USA), in the presence of trypsin as previously described (3).

#### RNA Extraction and Reverse Transcription-PCR (RT-PCR)

RNA was extracted from the supernatant by using the TRIzol method (Invitrogen, Carlsbad, CA, USA), and RT-PCR was performed by using the QIAGEN OneStep RT-PCR kit (QIAGEN, Hilden, Germany), performed with the following cycling conditions:  $50^{\circ}\text{C}$  for 30 min and  $95^{\circ}\text{C}$  for 15 min for the RT reaction, followed by 40 cycles of amplification at  $95^{\circ}\text{C}$  for 30 s,  $50^{\circ}\text{C}$  for 30 s, and  $72^{\circ}\text{C}$  for 1 min, with a final extension at  $72^{\circ}\text{C}$  for 10 min. Samples were tested with the pan-CoV primers for the RNA-dependent RNA polymerase (RdRp) gene (4). If the samples were positive by the pan-CoV RT-PCR, a larger fragment of the RdRp (349 nt), the

spike (553 nt), and M (439 nt) genes were amplified by RT-PCR (Technical Appendix Table 1). The M gene primers were designed from the conserved regions of 30 Transmissible gastroenteritis virus (TGEV), Porcine respiratory coronavirus (PRCV), and PEDV sequences present in the GenBank database while the RdRp primers were designed from 41 *alpha*, *beta*, *gamma*, and *delta* CoVs sequences from GenBank (Technical Appendix Table 1). Amplification of partial S1 (553 nt) was performed by primers described by Kim et al. 2001 (5), and the S1 segment (2785 nt) was designed by using the conserved regions of 18 available PEDV sequences (Technical Appendix Table 1). The amplicons were sequenced with the initial amplification primers by using ABI PRISM 3130 Automated Capillary DNA Sequencer (Applied Biosystems, Waltham, Massachusetts, USA). The 18 sequenced samples were then tested by PCR for TGEV and PRCV by using the previously described RT-PCR kit and thermal cycling conditions (6). The phylogenetic trees for the partial RdRp, S1, and M genes, the complete S1 gene and full-length genomes were constructed by using the neighbor-joining method p-distance model and bootstrap test of 1,000 replicates in MEGA 5 (<http://www.megasoftware.net/>).

## **Next Generation Sequencing Assembly**

Whole genome sequencing was performed on 1 strain from each genetic cluster because of limited available volume of sample. Seven milliliters of a 20% fecal homogenate were ultracentrifuged on 5 ml of 30% sucrose cushion at 35,000 rpm for 1 h at 4°C. The pellet was resuspended in 1x TE (10 mM Tris-HCl, 1 mM EDTA, pH 8) and treated with DNase (RNase-free DNase set, QIAGEN, Hilden, Germany). Purified viral RNA was extracted by using the protocol described above. Viral cDNA synthesis and whole genome amplification of nucleic acids were performed as described by Victoria and colleagues (7). The sequencing libraries were prepared by using the NEXTERA-XT DNA library Preparation kit (Illumina Inc. San Diego, CA, USA), and purified according to the manufacturer protocol and sequenced on an Illumina MiSeq by using the Miseq Reagent Kit v2, 250-cycle paired-end run (Illumina Inc. San Diego, CA, USA). Reads were assembled by using PEDV or TGEV reference genomes. When mean coverage was <5 or polymorphisms were present in more than 20% of the reads, Sanger sequencing was performed by primers (Technical Appendix Table 2).

## Nucleotide Sequence Accession Numbers

Partial and complete genome sequences obtained in this study were deposited in GenBank under accession nos. KT027383-KT027398 (RdRp), KT027399-KT027414 (S1), KT027415-KT027430 (M), KR061458 (PEDV/Italy/7239/2009) and KR061459 (SeCoV/Italy/213306/2009).

## Recombination Analysis

Recombination breakpoints were determined by using the Recombination Detection Program (RDP) 4.43 (<http://web.cbio.uct.ac.za/~darren/rdp.html>), with BOOTSCAN, GENECONV, MAXCHI, CHIMAERA, SISCAN, 3SEQ and LARD. Statistical significance was determined by using *p*-values <0.05.

## References

1. Martelli P, Lavazza A, Nigrelli AD, Merialdi G, Alborali LG, Pensaert MB. Epidemic of diarrhoea caused by porcine epidemic diarrhoea virus in Italy. *Vet Rec.* 2008;162:307–10. PubMed <http://dx.doi.org/10.1136/vr.162.10.307>
2. Sozzi E, Luppi A, Lelli D, Moreno Martin A, Canelli E, Brocchi E, et al. Comparison of enzyme-linked immunosorbent assay and RT-PCR for the detection of porcine epidemic diarrhoea virus. *Res Vet Sci.* 2010;88:166–8. PubMed <http://dx.doi.org/10.1016/j.rvsc.2009.05.009>
3. Hofmann M, Wyler R. Propagation of the virus of porcine epidemic diarrhoea in cell culture. *J Clin Microbiol.* 1988;26:2335–9. PubMed
4. Lelli D, Papetti A, Sabelli C, Rosti E, Moreno A, Boniotti MB. Detection of coronaviruses in various bat species in Italy. *Viruses.* 2013;5:2679–89. PubMed <http://dx.doi.org/10.3390/v5112679>
5. Kim SY, Song DS, Park BK. Differential detection of transmissible gastroenteritis virus and porcine epidemic diarrhoea virus by duplex RT-PCR. *J Vet Diagn Invest.* 2001;13:516–20. PubMed <http://dx.doi.org/10.1177/104063870101300611>
6. Kim L, Chang KO, Sestak K, Parwani A, Saif LJ. Development of a reverse transcription-nested polymerase chain reaction assay for differential diagnosis of transmissible gastroenteritis virus and porcine respiratory coronavirus from feces and nasal swabs of infected pigs. *J Vet Diagn Invest.* 2000;12:385–8. PubMed <http://dx.doi.org/10.1177/104063870001200418>

7. Victoria JG, Kapoor A, Dupuis K, Schnurr DP, Delwart EL. Rapid identification of known and new RNA virus from animal tissues. PLoS Pathog. 2008;4:e1000163. PubMed  
<http://dx.doi.org/10.1371/journal.ppat.1000163>

**Technical Appendix Table 1.** Primers used for sequencing for the S1, M and RdRp genes\*

| Primers           | Oligonucleotide sequence (5'-3') | Position†      |
|-------------------|----------------------------------|----------------|
| PEDV_S_1F         | GGTAAAGTTGCTAGTGCGTAA            | 20570–50589 nt |
| PEDV_S_1R         | TCCCATGTTATGCCGACAA              | 21116–21134 nt |
| PEDV_S_2F         | TAATGATGTTACACAGGTC              | 21039–21058 nt |
| PEDV_S_2R         | AGCAGTATGAAGTACAATTG             | 21629–21648 nt |
| PEDV_S_3F         | GGCTCTGAGGTTTAATATTA             | 21579–21598 nt |
| PEDV_S_3R         | GGTAAATTGTCTAGTGTCAA             | 22259–22278 nt |
| PEDV_S_4F         | TGAGTTGATTACTGGCAC               | 22503–22520 nt |
| PEDV_S_4R         | GCCATTAGTAACCACTTTAT             | 23336–23355 nt |
| M_1F              | AYCTTSAAACTGGAAYTTC              | 25722–25741 nt |
| M_1R              | ACATAGWAAGCCCAWCCAGT             | 26258–26277 nt |
| RdRp gene CoV_8F  | GGNTGGGAYTAYCCNAARTGYGA          | 14426–14448 nt |
| RdRp gene CoV_10R | TGYTGNGARCARAAAYTCRTG            | 15008–15027 nt |

\*M, membrane; RdRp, RNA-dependent RNA polymerase; S1, spike.

†Nucleotide position refers to PEDV CV777(AF353511).

**Technical Appendix Table 2.** Primers used to close the genome

| Primers       | Oligonucleotide sequence (5'-3') | Position*      |
|---------------|----------------------------------|----------------|
| 213306_1_for  | AGTAAAGTGAGTGTAGCGT              | 1–19 nt        |
| 213306_1_rev  | ACAAGGGCATCTAAGAGTA              | 1014–1032 nt   |
| 213306_2_for  | TATGGGAAATGGTGACTGT              | 957–975 nt     |
| 213306_2_rev  | GATGTCGTAAGATGGAAC               | 2055–2073 nt   |
| 213306_3_for  | GATTGGTAATGGTGTGAAAGT            | 2517–2537 nt   |
| 213306_3_rev  | CATTACCAGGACAATAGATT             | 4466–4486 nt   |
| 213306_4_for  | TCATTGTCCACATACTACAG             | 5279–5299 nt   |
| 213306_4_rev  | ACTACAATCACAACTCAGC              | 6391–6410 nt   |
| 213306_5_for  | ATAGTAGTCAAGAGTTCTC              | 6809–6828 nt   |
| 213306_5_rev  | CATAGCAGCAGATTCAAAGT             | 8675–8692 nt   |
| 213306_6_for  | TACATGGGCTAAAACACAGT             | 9624–9645 nt   |
| 213306_6_rev  | GAGGGCTAACATCATTITTTCTTA         | 11046–11068 nt |
| 213306_7_for  | TAGTGGAAAGGCTCTTATG              | 11634–11652 nt |
| 213306_7_rev  | TGACAATGTAGTAGGCATC              | 12480–12498 nt |
| 213306_8_for  | CGTTGCGTGTATTGGTAA               | 12416–12434 nt |
| 213306_8_rev  | CGTCATTGGTATTGTCATAG             | 13237–13256 nt |
| 213306_9_for  | AGACAGTAAAACCAGGTCA              | 13507–13525 nt |
| 213306_9_rev  | ATGGTGTGATAGACATAATGAA           | 15201–15222 nt |
| 213306_10_for | AGGCTATCACACTCTATTTTG            | 17078–07098 nt |
| 213306_10_rev | CACAACCTTGGACACAACAT             | 19348–19367 nt |
| 213306_11_for | CTCTATCATAAECTCAGTC              | 20167–20186 nt |
| 213306_11_rev | TAGGTAGATAACCACCCAA              | 20499–20517 nt |
| 213306_12_for | GTGACCACCTATGAC                  | 25375–25391 nt |
| 213306_12_rev | CCAAGCGTAGTAGTTTG                | 26812–26829 nt |
| 213306_13_for | GTAGAGGTGATGTGACAA               | 27171–27188 nt |
| 213306_13_rev | ATTGTTGGCTCGTCATAG               | 28017–28034 nt |
| 7239_1_for    | ATCTAYGGATAGTTAGCTCT             | 1–20 nt        |
| 7239_1_rev    | TCACCAACAGTCCAATGA               | 1027–1044 nt   |
| 7239_2_for    | GTGACGGGTTTTACAGAC               | 1977–1994 nt   |
| 7239_2_rev    | ACAAAAGAAGTTTTCAATGACGC          | 2790–2811 nt   |
| 7239_3_for    | TGTCCAGGAAGATGTTCA               | 4672–4689 nt   |
| 7239_3_rev    | TCCAATTTGTTGTCCATAAGTA           | 5233–5254 nt   |
| 7239_4_for    | GTAATGGTAACGGTGTGTTGT            | 5913–5931 nt   |
| 7239_4_rev    | GGAAAGGCATCACATTAC               | 6591–6608 nt   |
| 7239_5_for    | GAAGTTGGTAATGTTGTCAAAC           | 7031–7052 nt   |
| 7239_5_rev    | TATCACTGCTAACCTGAGTA             | 7921–7940 nt   |
| 7239_6_for    | CTATGACCTACTGTCGT                | 8442–8458 nt   |
| 7239_6_rev    | TAGGCGTATGGACATTGT               | 9543–9560 nt   |
| 7239_7_for    | AGATTTCTCCGTTCCAGTCTA            | 10995–11015 nt |
| 7239_7_rev    | CACAAGCGCTACCTTA                 | 12996–13012 nt |
| 7239_8_for    | CTAAGCGTAACATCCTGC               | 14150–14167 nt |
| 7239_8_rev    | TGGAGTGATGGACAAAATGAAT           | 15474–15495 nt |
| 7239_9_for    | CAAGGAGGAGAGCGTTA                | 15774–15790 nt |
| 7239_9_rev    | GAAACCCATAAACGAGATAAC            | 17305–17325 nt |

| Primers     | Oligonucleotide sequence (5'-3') | Position*      |
|-------------|----------------------------------|----------------|
| 7239_10_for | AGGGATCACTTAGCCTTAA              | 17891–17909 nt |
| 7239_10_rev | CAAGTTCTAAACACATACG              | 19765–19784 nt |
| 7239_11_for | CTAATGTGCTGGGTGTTTC              | 23230–23248 nt |
| 7239_11_rev | ATAAACTCTATACAAACGCCCTA          | 25579–25601 nt |
| 7239_12_for | CAGTGTAGTTGAGATTGTTGAAC          | 26738–26760 nt |
| 7239_12_rev | TAGGCTCGTCAAGCGGAT               | 27918–27935 nt |

\*Nucleotide position refers to complete genome of the samples 7239 and 213306.

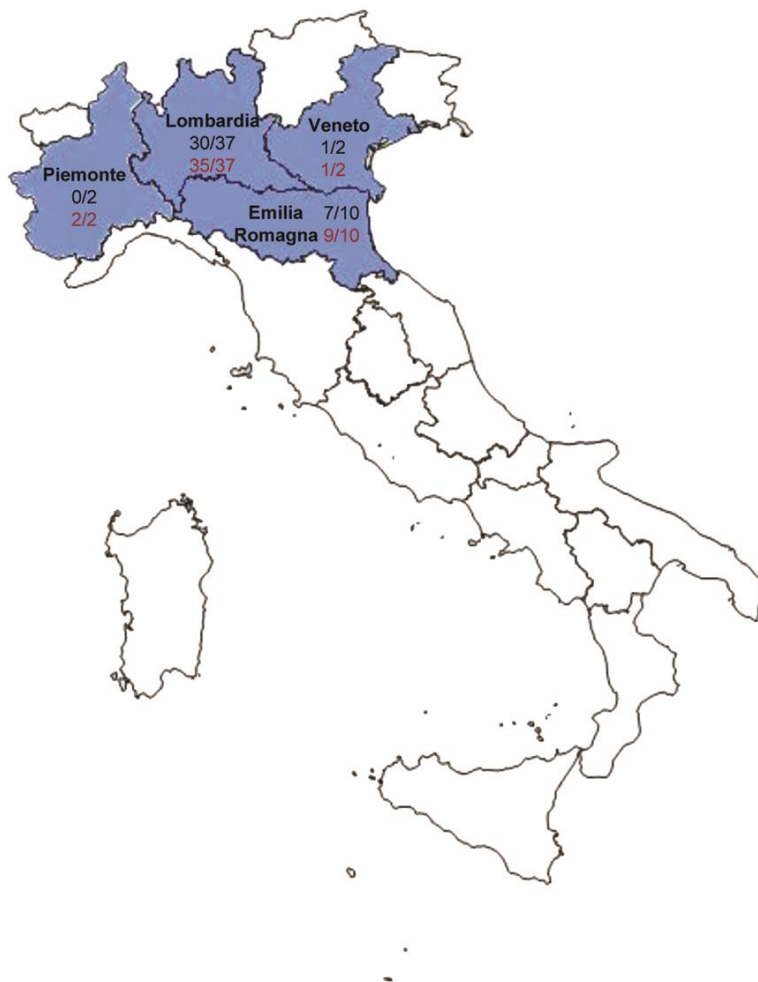

**Technical Appendix Figure 1.** Geographic distribution of the ELISA and pan-CoV RT-PCR results (red and black, respectively) from this study.

**A**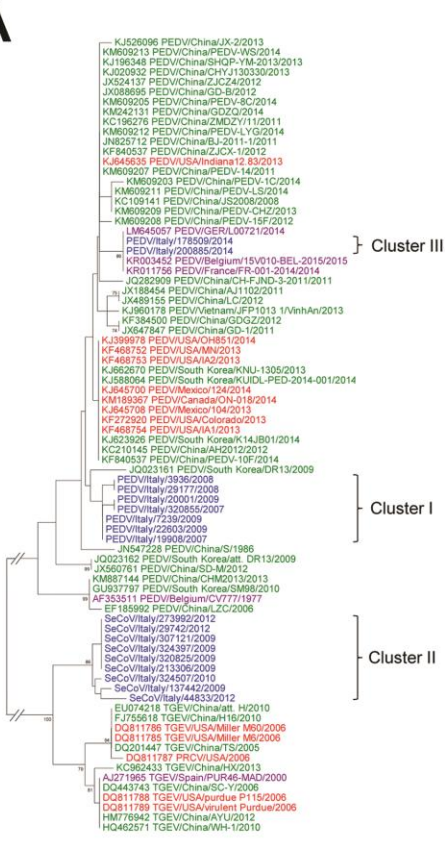**B**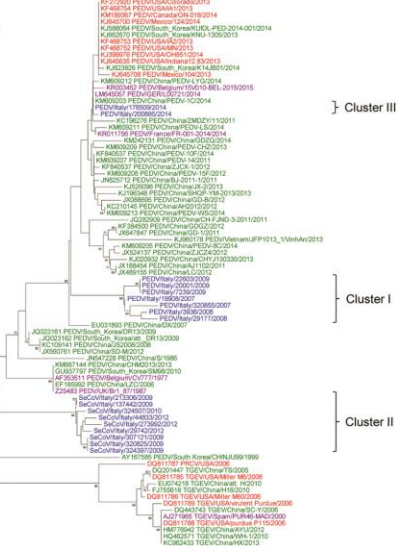**C**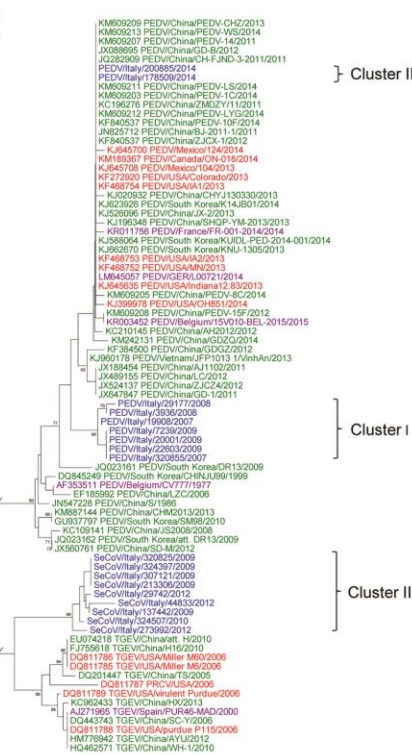

**Technical Appendix Figure 2.** Phylogenetic trees from the study of porcine epidemic diarrhea virus and a recombinant swine enteric coronavirus. A) Partial RNA-dependent RNA polymerase gene; B) spike (S1) gene; and C) membrane (M) gene. Bootstrap values >70% (1,000 replicates) are indicated. Reference sequences are identified by GenBank accession no. and strain name. The 18 strains from Italy identified from this study are represented in blue; strains from China are green; strains from America are red; and

strains from Europe are purple. PEDV, porcine epidemic diarrhea virus; PRCV, porcine respiratory coronavirus; TGEV, transmissible gastroenteritis virus; SeCoV, swine enteric coronavirus.
